# Supplementary material for: Redox-active cyclopentadienyl Ni complexes with quinoid N-heterocyclic carbene ligands for the electrocatalytic hydrogen release from chemical fuels
Source: Royal Society of Chemistry journal article supplement (doi:10.1039/c3nj00276d), 2013-01-01
Supplement: c3nj00276d.pdf [file c3nj00276d.pdf]

Supporting Information for

# **Redox-Active Cyclopentadienyl Ni Complexes with Quinoid N-Heterocyclic Carbene Ligands for the Electrocatalytic Hydrogen Release from Chemical Fuels**

*Oana R. Luca,<sup>†</sup> Daria L. Huang,<sup>†</sup> Michael K. Takase,<sup>†</sup> Robert H. Crabtree<sup>†\*</sup>*

<sup>†</sup>Department of Chemistry, Yale University 225 Prospect St., New Haven, CT, 06520-8107 USA

\*E-mail: robert.crabtree@yale.edu

## **Table of Contents**

**S1. Synthesis and Characterization of compound 1**

**S2. XRay Structure of 1**

**S4. Electrochemistry Details**

**S3. Additional Cyclic Voltammograms**

**S4. Ni and NiO controls**

## S1. Synthesis and Characterization of compound 1

To a 20 mL solution of 1.1 equivalents of nickelocene (41 mg, 0.22 mmol) in anhydrous THF, the yellow quinone-annulated dimesitylimidazolium chloride **ImQ** (0.2 mmol) was added as a solid as shown in **Eq 1**. The resulting suspension was then refluxed for 4 hours. **1** was isolated as a red solid in 69% yield by column chromatography in 4:1 hexanes/ ethylacetate as a brown-red solid. FT-ICR MS analysis was performed at the Yale Keck Proteomics facility on a 9.4 T Bruker Qe FT-ICR MS. Elemental Analysis was performed by Robertson Microlit.

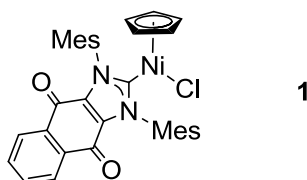

$^1\text{H}$  NMR (500 MHz,  $\text{CD}_2\text{Cl}_2$ )  $\delta$  8.01 (s, 2H,  $\text{Ar}_{\text{CH}}$ ), 7.74 (s, 2H,  $\text{Ar}_{\text{CH}}$ ), 7.20 (s, 4H,  $\text{Mes}_{\text{CH}}$ ), 4.58 (s, 5H,  $\text{Cp}_{\text{CH}}$ ), 2.50 (s, 6H,  $\text{Mes}_{p\text{-CH}_3}$ ), 2.08 (s, 12H,  $\text{Mes}_{o,o'\text{-CH}_3}$ ).  $^{13}\text{C}\{^1\text{H}\}$  (126 MHz,  $\text{CD}_2\text{Cl}_2$ )  $\delta$  141.19, 135.85, 135.35, 133.00, 130.66, 128.25, 94.34, 22.46, 19.66. FT ICR MS:  $[\text{M}-\text{Cl}]$  calculated 557.1734, found 557.1721. Elemental Analysis. Expected: C: 68.77%, H: 5.26%, N: 4.72% Found: C: 68.59%, H: 5.23%; N: 4.44%.

## S2. XRay Structure of 1

Low-temperature diffraction data ( $\omega$ -scans) were collected on a Rigaku MicroMax-007HF diffractometer coupled to a Saturn 994+ CCD detector with Cu  $K_\alpha$  ( $\lambda = 1.54178 \text{ \AA}$ ). The structure was solved by direct methods using SHELXS and refined against  $F^2$  on all data by full-matrix least squares with SHELXL-97<sup>1-2</sup> using established refinement techniques.<sup>3</sup> All non-hydrogen atoms were refined anisotropically. All hydrogen atoms were included into the model at geometrically calculated positions and refined using a riding model. The isotropic displacement parameters of all hydrogen atoms were fixed to 1.2 times the  $U$  value of the atoms

they are linked to (1.5 times for methyl groups). The structure crystallizes in the monoclinic space group  $P2_1/c$  with one molecule in the asymmetric unit.

**Table S2.** Crystal data and structure refinement for compound **1**.

|                                |                                    |                       |
|--------------------------------|------------------------------------|-----------------------|
| Empirical formula              | $C_{34}H_{31}ClN_2NiO_2$           |                       |
| Formula weight                 | 593.77                             |                       |
| Temperature                    | 93(2) K                            |                       |
| Wavelength                     | 1.54187 Å                          |                       |
| Crystal system                 | Monoclinic                         |                       |
| Space group                    | $P2_1/c$                           |                       |
| Unit cell dimensions           | $a = 11.7071(2)$ Å                 | $a = 90^\circ$        |
|                                | $b = 15.6490(3)$ Å                 | $b = 99.715(7)^\circ$ |
|                                | $c = 15.7529(11)$ Å                | $\gamma = 90^\circ$   |
| Volume                         | $2844.6(2)$ Å <sup>3</sup>         |                       |
| Z                              | 4                                  |                       |
| Density (calculated)           | $1.386$ mg/m <sup>3</sup>          |                       |
| Independent reflections        | 5028 [R(int) = 0.1301]             |                       |
| Refinement method              | Full-matrix least-squares on $F^2$ |                       |
| Data / restraints / parameters | 5028 / 0 / 367                     |                       |
| Goodness-of-fit on $F^2$       | 1.136                              |                       |
| Final R indices [I > 2σ(I)]    | R1 = 0.0603, wR2 = 0.1592          |                       |
| R indices (all data)           | R1 = 0.0732, wR2 = 0.1732          |                       |
| Largest diff. peak and hole    | 0.474 and -0.807 e.Å <sup>-3</sup> |                       |

### S3. Additional Voltammograms

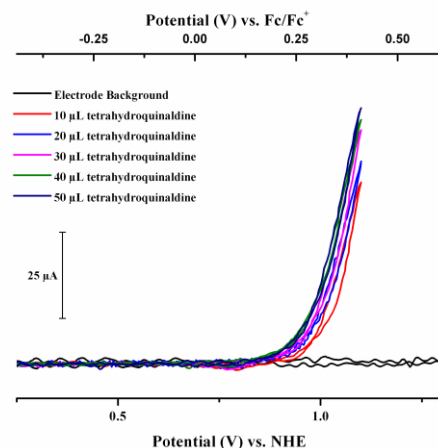

**Figure S3-1.** Cyclic Voltammetry of the bare Pt electrode in a 0.1 M  $\text{NBu}_4\text{BF}_4$  acetonitrile solution at with increments of added tetrahydroquinoline.

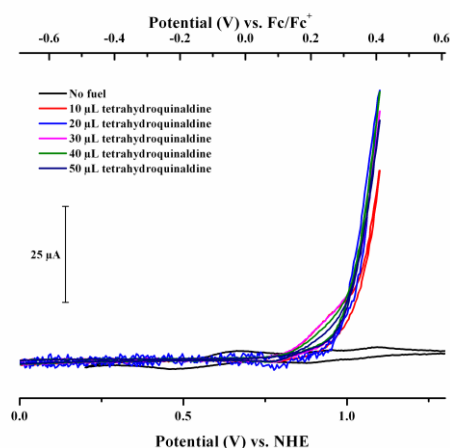

**Figure S3-2.** Cyclic Voltammetry of 2mM **2** Pt at electrode in a 0.1 M  $\text{NBu}_4\text{BF}_4$  acetonitrile solution at with increments of added tetrahydroquinoline.

#### S4. Electrochemistry Details

Cyclic voltammograms (CVs) in acetonitrile were collected on Pt electrodes (3 mm diameter from Bioanalytical Systems) with a platinum wire counter electrode and a silver wire reference electrode (referenced to NHE with ferrocene as external standard  $E_{1/2}=690$  mV vs. NHE)<sup>4</sup> in a double junction BASi setup. Measurements were performed in 0.1 M NBu<sub>4</sub>BF<sub>4</sub> solutions at 2 mM concentration of the respective complexes. Data workup was performed on OriginPro v8.0988 and AfterMath Data Organizer Version 1.2.3383.

Electrolyses were performed in a concentric two-cylinder cell, (an adapted Basi MF-1056 setup) using a BASi Pt gauze cylinder as the working electrode. The counter electrode was a specially-prepared high surface area RVC rod (~6 mm diameter) equipped with a pin connector (connected to the RVC by Ag conducting epoxy). The supporting electrolyte was acetonitrile with 0.2 M NBu<sub>4</sub>BF<sub>4</sub>. The working cell volume was 50 mL, whereas the counter chamber (E-fritted 1cm-diameter glass tube) contained 5 mL. 200  $\mu$ L (1.38 mmol) tetrahydroquinoline was added to the working chamber and the dissolved catalyst (7.5  $\mu$ mol, 0.5 mol%). Controlled potential electrolysis at 1 V vs NHE was performed for 4 h, during which no significant change in solution volume was observed. At the end of the reaction, the solution in the working chamber was concentrated under reduced pressure and extracted with 3\*75mL diethyl ether. The solvent from the yellow-orange extract was then removed under reduced pressure. Quinaldine (dehydrogenation product) was further isolated via silica gel column chromatography in 4:1 hexanes/ethyl acetate. Control experiment without catalyst yielded in no observed dehydrogenation product.

Control experiments on a 8 cm by 12 cm Stainless Steel 316 Mesh #60 (0.0075" Wire Diameter 31% Open Area Plain Weave 12" x 24") yielded no quinaldine in the absence of catalyst. Under the catalytic conditions (7.5 $\mu$ mol **1**, 0.5 mol%), 30% quinaldine product was observed.

Control experiments with a BASi RVC basket working electrode were performed under the previous conditions. Under catalytic conditions (7.5 $\mu$ mol **1**, 0.5 mol%), 55% quinaldine was isolated post-electrolysis. No product observed in the absence of the **1**, although significant charge was passed through the solution, indicating a significant amount of side-reactivity related to the electrode surface.

## S5. NiO and Ni controls

**Table S2** .Chemical and Faradaic yields for tetrahydroquinoline dehydrogenation at a Pt electrode with Ni powder and NiO (0.5%).

| Heterogeneous catalyst | Chemical Yield | Faradaic Efficiency |
|------------------------|----------------|---------------------|
| Ni                     | 30 %           | 34 %                |
| NiO                    | 40 %           | 53 %                |

## Additional References

1. Sheldrick, G. M. *Acta Cryst.* **1990**, *A46*, 467.
2. Sheldrick, G. M. *Acta Cryst.* **2008**, *A64*, 112.
3. Müller, P. *Cryst. Rev.* **2009**, *15*, 57.
4. Bard, A. J.; Faulkner, L. R., *Electrochemical Methods: Fundamentals and Applications*. Wiley: New York, **2000**.
